# Supplementary material for: Ultrasonic assisted exfoliation for efficient production of RuO2 monolayer nanosheets
Source: Royal Society of Chemistry journal article supplement (doi:10.1039/d1qi00652e), 2021-01-01
Supplement: d1qi00652e1.pdf [file d1qi00652e1.pdf]

## [Supporting Information]

### **Ultrasonic Assisted Exfoliation for Efficient Production of RuO<sub>2</sub> Monolayer Nanosheets**

Se Yun Kim,<sup>†a</sup> Sang-il Kim,<sup>†b</sup> Mun Kyoung Kim,<sup>c</sup> Jinhong Kim,<sup>a</sup> Soichiro Mizusaki,<sup>a</sup> Dong-Su Ko,<sup>d</sup> Changhoon Jung,<sup>d</sup> Dong-Jin Yun,<sup>d</sup> Jong Wook Roh,<sup>e</sup> Hyun-Sik Kim,<sup>f</sup> Hiesang Sohn,<sup>g</sup> Jong-Hyeong Lim,<sup>h</sup> Jong-Min Oh,<sup>h</sup> Hyung Mo Jeong,<sup>\*c</sup> and Weon Ho Shin<sup>\*h</sup>

<sup>a</sup>Inorganic Material Lab, Samsung Advanced Institute of Technology, Suwon 16678, Republic of Korea.

<sup>b</sup>Department of Materials Science and Engineering, University of Seoul, Seoul 02504, Republic of Korea.

<sup>c</sup>School of Mechanical Engineering, Sungkyunkwan University, Suwon 16419, Republic of Korea. E-mail: hmjeong@skku.edu

<sup>d</sup>Autonomous Material Development Lab, Samsung Advanced Institute of Technology, Suwon 16678, Republic of Korea.

<sup>e</sup>School of Nano & Materials Science and Engineering, Kyungpook National University, Sangju 37224, Republic of Korea.

<sup>f</sup>Department of Materials Science and Engineering, Hongik University, Seoul 04066, Republic of Korea.

<sup>g</sup>Department of Chemical Engineering, Kwangwoon University, Seoul 01897, Republic of Korea.

<sup>h</sup>Department of Electronic Materials Engineering, Kwangwoon University, Seoul 01897, Republic of Korea. E-mail: weonho@kw.ac.kr

<sup>†</sup> These authors contributed equally to this work.

## S1. The concentration and yield of RuO<sub>2</sub> nanosheets derived from the UV-vis spectroscopy

The equation of the concentration of RuO<sub>2</sub> nanosheets is as below.

$$C = \frac{AM_w}{\alpha l} \quad (\text{eq 1})$$

C, A, M<sub>w</sub>, α, and l are concentration of the RuO<sub>2</sub> nanosheets, absorbance at 360 nm, molar weight of RuO<sub>2</sub>, the molar extinction coefficient of the dispersed RuO<sub>2</sub> monolayers in aqueous solution (7.4 x 10<sup>3</sup> mol<sup>-1</sup>dm<sup>3</sup>cm<sup>-1</sup> at 360 nm)<sup>s1</sup>, and the length of cuvette, respectively.

The equation of the yield of the RuO<sub>2</sub> nanosheets is as below

$$Y = \frac{AM_w L}{\alpha l m} \quad (\text{eq 2})$$

Y, L, and m are the yield of the RuO<sub>2</sub> nanosheets, an initial volume of aqueous solution, and an initial weight of H<sub>x</sub>RuO<sub>2</sub> layered materials, respectively.

## References

S1. K. Fukuda, H. Kato, J. Sato, W. Sugimoto, and Y. Takasu, *J. Solid State Chem.*, 2009, **182**, 2997.

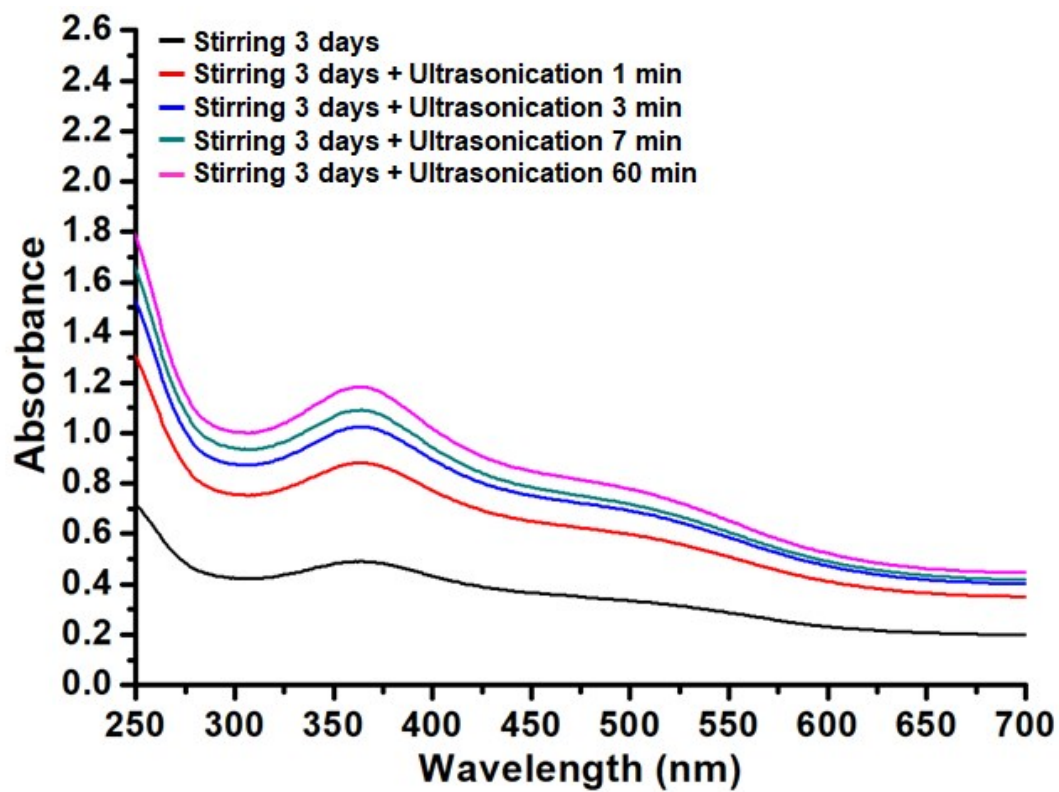

**Figure S1.** UV-vis absorption spectra of the RuO<sub>2</sub> nanosheets contained aqueous solution.

## S2. SEM images of exfoliated RuO<sub>2</sub> nanosheets

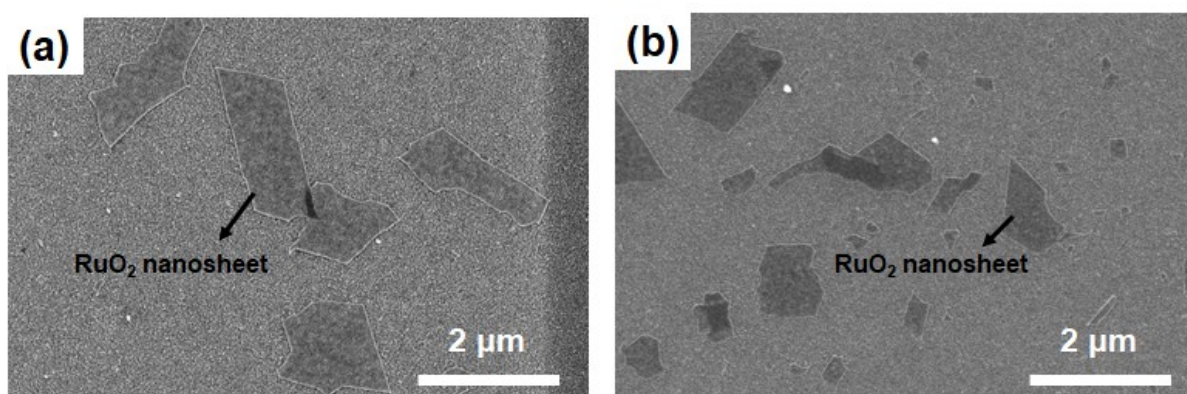

**Figure S2.** SEM images of exfoliated RuO<sub>2</sub> nanosheets using a) 1 minute and b) 7 minutes of ultrasonication.
